# Supplementary material for: New anthracene-based organic dyes: the flexible position of the anthracene moiety bearing isolation groups in the conjugated bridge and the adjustable cell performance
Source: Royal Society of Chemistry journal article supplement (doi:10.1039/c5qo00377f), 2015-12-08
Supplement: c5qo00377f1.pdf [file c5qo00377f1.pdf]

*Electronic Supplementary Information*

**New Anthracene-Based Organic Dyes: the Changeable Position of the Anthracene Moiety Bearing Isolation Groups in the Conjugated Bridge and the Adjustable Cell Performance**

Huiyang Li,<sup>a</sup> Manman Fang,<sup>a</sup> Ting Xu,<sup>a</sup> Yingqin Hou,<sup>a</sup> Runli Tang,<sup>a</sup> Junnian Chen,<sup>a</sup> Linfeng Liu,<sup>b</sup> Hongwei Han,<sup>b</sup> Tianyou Peng,<sup>a</sup> Qianqian Li\*<sup>a</sup> and Zhen Li\*<sup>a</sup>

<sup>a</sup> Department of Chemistry, Hubei Key Lab on Organic and Polymeric Opto-Electronic Materials, Wuhan University, Wuhan 430072, China.

<sup>b</sup> Michael Grätzel Center for Mesoscopic Solar Cells, Wuhan National Laboratory for Optoelectronics, Huazhong University of Science and Technology, Wuhan, 430072, China.

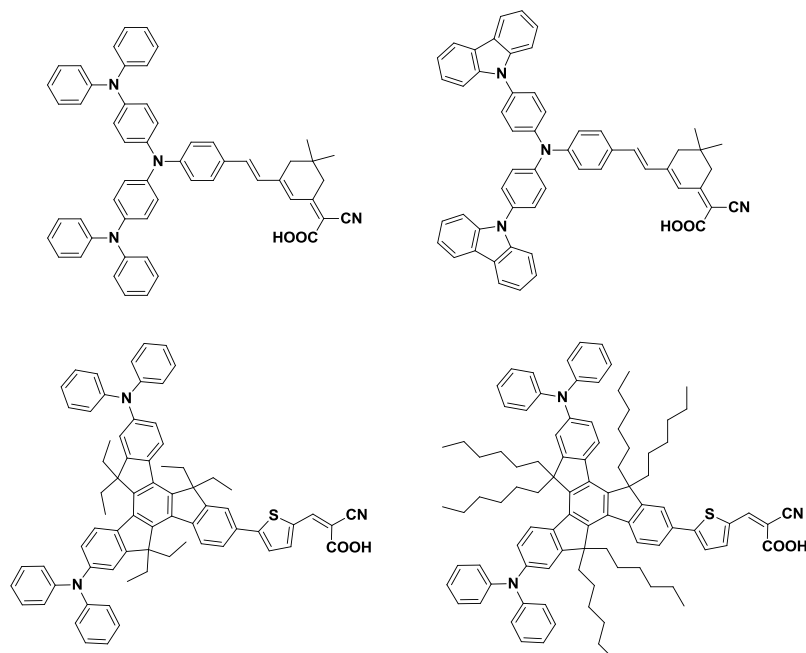

**Fig. S1** The structures of starburst triarylamine-based sensitizers reported by Tian's group

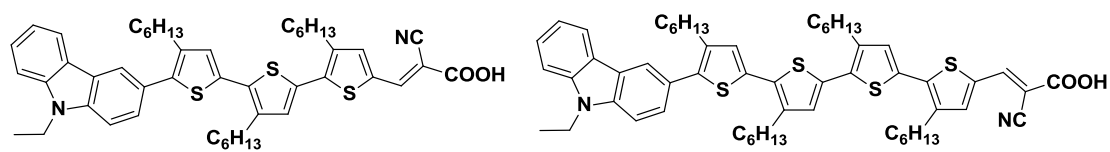

**Fig. S2** The structures of alkyl-functionalized organic dyes reported by Hara's group

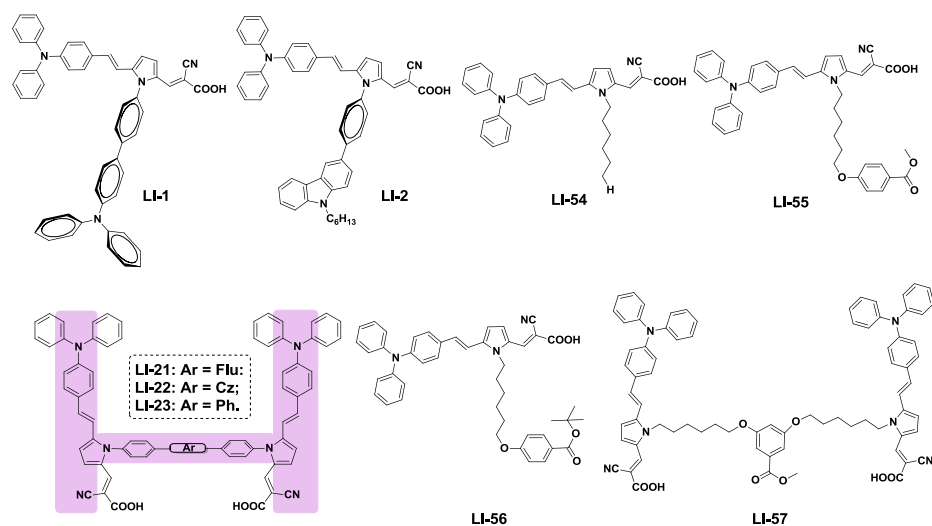

**Fig. S3** The structures of pyrrole-based organic dyes with one isolation group

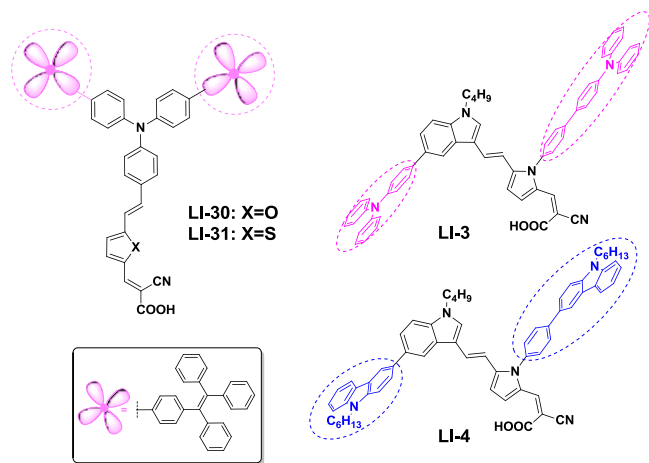

**Fig. S4** The structures of organic dyes with two isolation groups

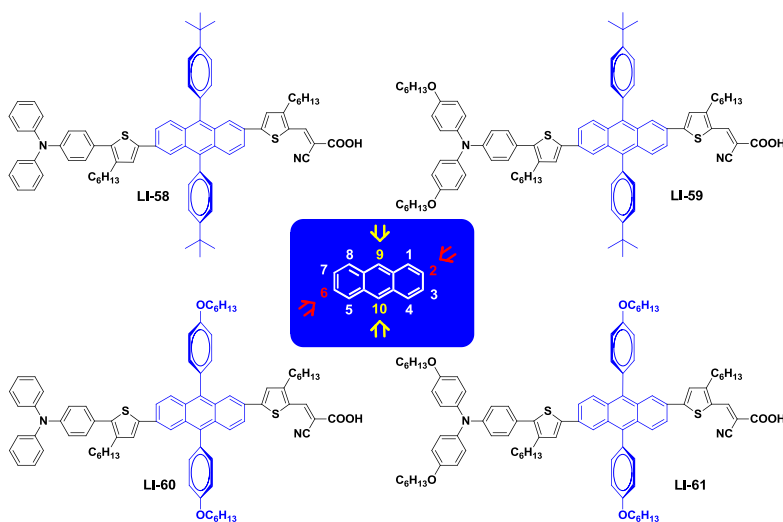

**Fig. S5** The structures of anthracene-based organic dyes

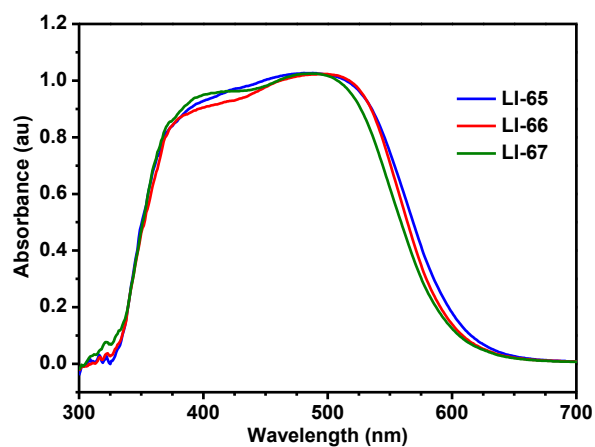

**Fig. S6** UV-vis spectra of the sensitizers on TiO<sub>2</sub> films.

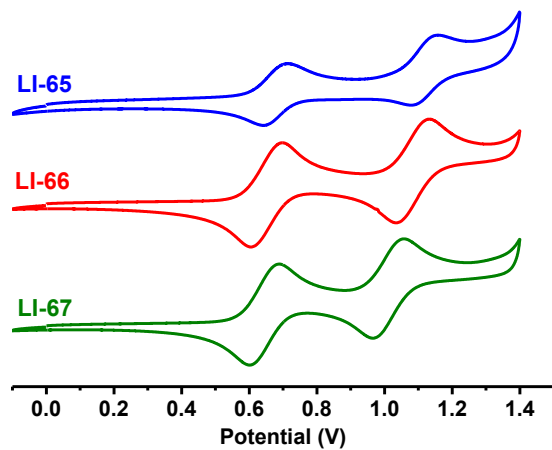

**Fig. S7** Cyclic voltammograms of sensitizers in  $\text{CH}_2\text{Cl}_2$

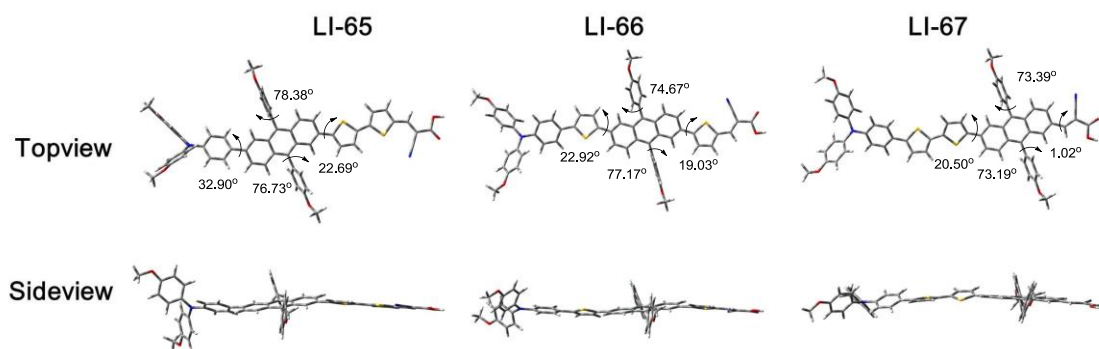

**Fig. S8** The optimized structures of the sensitizers

**Table S1** Dye-sensitized solar cell performance data of the sensitizers

| Dye          | CDCA (mM) | $V_{oc}$ (V) | $J_{sc}$ ( $\text{mA cm}^{-2}$ ) | $FF$ | $\eta$ (%) |
|--------------|-----------|--------------|----------------------------------|------|------------|
| <b>LI-65</b> | 0         | 695          | 13.95                            | 0.65 | 6.34       |
|              | 10        | 703          | 12.22                            | 0.67 | 5.72       |
| <b>LI-66</b> | 0         | 722          | 12.95                            | 0.69 | 6.44       |
|              | 10        | 728          | 13.06                            | 0.65 | 6.22       |
| <b>LI-67</b> | 0         | 698          | 10.68                            | 0.69 | 5.15       |
|              | 10        | 682          | 10.35                            | 0.62 | 4.38       |
